# Supplementary material
Source: publisher site journal article supplement (https://www.dovepress.com/article/522910)
Supplement: Supplementary file 1 [file Supplementary%20Material_1.docx]

**Supplementary Material**

**Supplementary Methods**

**1 Inclusion and exclusion criteria**

Inclusion criteria were as follows: (1) confirmed HIV-positive status; (2) at least 18 years of age; (3) right-handedness; (4) initiation of ART with good adherence; and (5) no use of antipsychotic medications. Exclusion criteria included: (1) presence of unstable opportunistic infections (including active tuberculosis or cryptococcal meningitis), (2) psychiatric disorders that might impact adherence to HIV care, (3) aminotransferases levels 3 times or more above the normal upper limits, (4) estimated glomerular filtration rate (eGFR) ≤ 50 mL/min, and (5) medical insurance issues that might affect the initiation of rapid ART.

**2** **Mass Cytometry data analysis**

The raw data of each sample were de-barcoded using unique mass-tagged barcodes in a doublet-filtering scheme. A bead normalization method was applied to standardize the .fcs file obtained from various batches. Data processing involved meticulous gating using FlowJo 10.8.1 software to eliminate debris and dead cells. Subsequently, CD45+CD3+ cells were manually gated (Figure 1A) for further analysis with R. The cells were divided into different clusters based on surface marker expression levels using the PhenoGraph clustering algorithm. To visualize the high-dimensional data, we applied t-distributed stochastic neighbor embedding (t-SNE), a dimensionality reduction algorithm. The distribution of each cluster, marker expression analysis, and comparisons among various groups or sample types were performed using R software (version 3.6.0).

**3 Cytokine and chemokine assay**

A comprehensive cytokine/chemokine assay was performed on plasma samples from different groups using the EMD Millipore's MILLIPLEX® MAP Human Cytokine/Chemokine/Growth Factor Panel A MAGNETIC BEAD PANEL 96-Well Plate Assay, which utilizes advanced Luminex® xMAP® technology. Capture antibody-coupled magnetic beads selectively bound the target analytes in the plasma. After incubation and washing, detection reagents were added, and the plate was analyzed using Luminex® 200™ HTS and FLEXMAP 3D® software.

**Supplementary Results**

**1 Rapid ART normalized the proliferation and differentiation of CD4+ T cells**

To elucidate the impact of rapid ART on the cell phenotypes of various T cell subpopulations, we categorized CD4+ T cells into four distinct subpopulations: naive T cells (TN, CD45RA+ CCR7+), effector memory T cells (TEM, CD45RA- CCR7-), terminally differentiated effector memory T cell re-expressing CD45RA (TEMRA, CD45RA+ CCR7-), and central memory T cells (TCM, CD45RA- CCR7+). We segmented all T cells into 20 distinct clusters, and the distribution of each cluster, along with the expression of associated markers, was compared between the rapid ART and non-rapid ART groups (Fig. 2A, 2B). Among the CD4+ T cell clusters, C14, C16, C18, and C21 represented TN cells; C5, C7, C12, and C20 corresponded to TEM cells; C3 was identified as TEMRA cells; while C1, C2, C4, C6, C8, C9, C10, C11, C13, C15, C17, and C19 were categorized as TCM cells (Fig. 2C).

**2 Rapid ART inhibits hyperactivation and exhaustion of CD8+T cells**

We analyzed the cell phenotypes of various CD8+ T cell subpopulations. Similar to CD4+ T cells, CD8+ T cells were classified into four subpopulations: TN, TEM, TEMRA, and TCM cells. We categorized all cells into 20 distinct clusters (Fig. 3A). The distribution of each cluster and the expression of associated markers in both the rapid ART and non-rapid ART groups are illustrated in Fig. 3B. Among the 20 CD8+ T cell clusters, the TN cell clusters included C1, C6, C7, C14, C15, C18, and C19; the TEM cell clusters comprised C3, C11, C13, C16, and C21; the TEMRA cell clusters were C4, C9, and C17; while the TCM cell clusters included C2, C5, C8, C10, C12, and C20 (Fig. 3C).

Supplementary Table 1 Antibodies and isotopes used for mass cytometry

|  | Antibodies Name | Isotopes Name | Clone | Company | Size (Tests) |
| --- | --- | --- | --- | --- | --- |
| 1 | Anti-Human CD16 | 209Bi | 3GB | Fluidigm, South San Francisco, United States | 100 |
| 2 | Anti-Human CD57 | 142Nd | HCD57 | Fluidigm, South San Francisco, United States | 100 |
| 3 | Anti-Human KI67 | 161Dy | B56 | Fluidigm, South San Francisco, United States | 100 |
| 4 | Anti-Human FOXP3 | 162Dy | PCH101 | Fluidigm, South San Francisco, United States | 50 |
| 5 | Anti-Human CCR7 | 167Er | G403H7 | Fluidigm, South San Francisco, United States | 50 |
| 6 | Anti-Human CD127 | 168Er | A019D5 | Fluidigm, South San Francisco, United States | 100 |
| 7 | Anti-Human HLA-DR | 170Er | L243 | Fluidigm, South San Francisco, United States | 100 |
| 8 | Anti-Human CD107A | 151Eu | H4A3 | Fluidigm, South San Francisco, United States | 100 |
| 9 | Anti-Human CCR2 | 153Eu | K036C2 | Fluidigm, South San Francisco, United States | 100 |
| 10 | Anti-Human CD163 | 154Sm | GHI/61 | Fluidigm, South San Francisco, United States | 100 |
| 11 | Anti-Human PD-1 | 155Gd | EH12.2H7 | Fluidigm, South San Francisco, United States | 100 |
| 12 | Anti-Human PD-L1 | 156Gd | 29E.2A3 | Fluidigm, South San Francisco, United States | 100 |
| 13 | Anti-Human PERFORIN | 175Lu | B-D48 | Fluidigm, South San Francisco, United States | 100 |
| 14 | Anti-Human CD45RA | 143Nd | Hl100 | Fluidigm, South San Francisco, United States | 100 |
| 15 | Anti-Human CD4 | 145Nd | RPA-T4 | Fluidigm, South San Francisco, United States | 100 |
| 16 | Anti-Human CD8 | 146Nd | RPA-T8 | Fluidigm, South San Francisco, United States | 100 |
| 17 | Anti-Human CD3 | 141Pr | UCHT1 | Fluidigm, South San Francisco, United States | 100 |
| 18 | Anti-Human CD31 | 144Nd | WM59 | Fluidigm, South San Francisco, United States | 100 |
| 19 | Anti-Human CD14 | 148Nd | RM052 | Fluidigm, South San Francisco, United States | 100 |
| 20 | Anti-Human CD25 | 149Sm | 2A3 | Fluidigm, South San Francisco, United States | 100 |
| 21 | Anti-Human CD86 | 150Nd | IT2.2 | Fluidigm, South San Francisco, United States | 100 |
| 22 | Anti-Human CD45 | 89Y | HI30 | Fluidigm, South San Francisco, United States | 100 |
| 23 | Anti-Human CD38 | 172Yb | HIT2 | Fluidigm, South San Francisco, United States | 100 |

|  | Subpopulation | Clusters | Markers |
| --- | --- | --- | --- |
| CD4+ T cells | TN cells | C14, C16, C18, C21 | CD45RA+ CCR7+ |
|  | TEM cells | C5, C7, C12, C20 | CD45RA- CCR7- |
|  | TEMRA cells | C3 | CD45RA+ CCR7- |
|  | TCM cells | C1, C2, C4, C6, C8, C9, C10, C11, C13, C15, C17, C19 | CD45RA- CCR7+ |
|  |  |  |  |
| CD8+ T cells | TN cells | C1, C6, C7, C14, C15, C18, C19 | CD45RA+ CCR7+ |
|  | TEM cells | C3, C11, C13, C16, C21 | CD45RA- CCR7- |
|  | TEMRA cells | C4, C9, C17 | CD45RA+ CCR7- |
|  | TCM cells | C2, C5, C8, C10, C12, C20 | CD45RA- CCR7+ |

**Supplementary Table 2** Definition of T cell clusters

**Note:** TN: Naïve T cells; TEM: Effector memory T cells; TEMRA: CD45RA+ effector memory T cells; TCM: Central memory T cells.
